# Supplementary material for: Near-Infrared 810 nm Light Affects Porifera Chondrosia reniformis (Nardo, 1847) Regeneration: Molecular Implications and Evolutionary Considerations of Photobiomodulation–Animal Cell Interaction
Source: MDPI journal article supplement (doi:10.3390/ijms24010226), 2022-12-23
Supplement: s1 [file s1]

**Table S1.** PCR primer used for PCR reactions

| Gene               | Sequence                        | Position  | Accession number |
|--------------------|---------------------------------|-----------|------------------|
| GAPDH (forward)    | 5'-AAGCCACCATCAAGAAGG-3'        | 882-899   | KM217385.1       |
| GAPDH (reverse)    | 5'-CCACCAGTTTCACAAAGC-3         | 1023-1040 | KM217385.1       |
| HSP60 (forward)    | 5'-ACTATCATCTCGCCAATCG-3'       | 74-92     | ON814140*        |
| HSP60 (reverse)    | 5'-TTATCCACTCCACTCAACATT-3'     | 173-193   | ON814140*        |
| HSP70 (forward)    | 5'-TGTCAGTTCAGCAGTAGTG-3'       | 536-555   | ON814141*        |
| HSP70 (reverse)    | 5'-TGTCAGTTCAGCAGTAGTG-3'       | 636-657   | ON814141*        |
| HSP90 (forward)    | 5'-ACCGCATTTCATCGCTTGG-3'       | 298-316   | ON814142*        |
| HSP90 (reverse)    | 5'-GCTTCATCGTCACCTTCTTCC-3'     | 385-406   | ON814142*        |
| NOS (forward)      | 5'-CCACACTCTCCATAGCATTCT-3'     | 378-392   | ON814144*        |
| NOS (reverse)      | 5'-CCGTCCTCSGCGTAACAC-3'        | 487-505   | ON814144*        |
| TNF (forward)      | 5'-AGAAATCGCCAGAAGCAAGTTG-3'    | 210-230   | KR072662         |
| TNF (reverse)      | 5'-GATGAGCACATTGATAGCAGACC-3'   | 264-286   | KR072662         |
| Bcl-2 (forward)    | 5'-ATATTCACCAAGCCAATGC-3'       | 366-384   | MF380423         |
| Bcl-2 (reverse)    | 5'-CCAGACACCACTCTATCG-3'        | 525-542   | MF380423         |
| Msi-1 (forward)    | 5'-ATTGGAATGCTTAGTGAAATGC-3'    | 428-449   | MH687926         |
| Msi-1 (reverse)    | 5'-GTGTCTACCTTGCCATTGC-3'       | 598-617   | MH687926         |
| Wnt (forward)      | 5'-AGTGTGATGCTGTTAGTGA-3'       | 793-822   | ON814145*        |
| Wnt (reverse)      | 5'-TGCGACATTGACCTTCTATA-3'      | 888-908   | ON814145*        |
| Fibrillar collagen | 5'-GTCATCCAGGTCGTCAAG-3'        | 1306-1323 | KR072664         |
| Fibrillar collagen | 5'-TAGGTCAATCTCTAATTCAGC-3'     | 1482-1502 | KR072664         |
| FGF (forward)      | 5'-CCTTCGTATCTTAGAGAATGGA-3'    | 229-251   | ON814143*        |
| FGF (reverse)      | 5'-ATGTTGCGGAACCTTGAGA-3'       | 324-342   | ON814143*        |
| Tgf3 (forward)     | 5'-TGCCAATACCGTCCAAGTC-3'       | 320-338   | MH687919         |
| Tgf3 (reverse)     | 5'-TGCCTTCCTCCTCCTCTG-3'        | 493-510   | MH687919         |
| Tgf4 (forward)     | 5'-CATGAATGAAGCAATATCAACTG-3'   | 6-28      | MH687920         |
| Tgf4 (reverse)     | 5'-ATTTATTGTTTCGTGGTTTCTTTAC-3' | 166-189   | MH687920         |
| Tgf5 (reverse)     | 5'-ATTTATTGTTTCGTGGTTTCTTTAC-3' | 134-153   | MH687921         |
| Tgf5 (reverse)     | 5'-AGTCCTTTCGTCTTTCCTTATCG-3'   | 189-211   | MH687921         |
| Tgf6 (forward)     | 5'-CCACCTCTGAACAACAACAATAAC-3'  | 483-506   | MH687922         |
| Tgf6 (reverse)     | 5'-CTATGAGCACGGCAGCAAAG-3'      | 593-612   | MH687922         |

\* In case the publication data of the present article is previous to the genebank sequence release, the FASTA sequences are reported below.

>Hsp60

GGACGCACGTTTTAGCTGTAACTGGTTTATCGCCGACTGTAAAGCAATGCAAGCTCTGA  
GACATTTTTATCGACTATCATCTCGCCAATCGATGCGGAGTGCTCCTAGAATGGTGACTC  
CTTGCGGATACTACGCTAAAGACATCAAGTATGGTGCAGAGGGTAGAGCTGAAATGTTGA  
GTGGAGTGGATAAACTGGCTGATGCTGTTGCAGTAACTTTGGGCCCCAAGGTACAGAGTG  
TGGTAACACAGAGcAGGATACACACATATGACATAGTAGTATGCTCGTCGAAAGGGGAAA  
aCCGaGCAAGGAAGCGTCCATCCATCCATCAATAGCCTAATtAGCcGGACCAATTTGCCT  
ATATGGCCAACTAATAGGAGAGCCAGATAaCATTATtACATAgAATAATAGAGGTGGGA  
GGATGAGATtAgTATAAAAGTCCATGAaGA

>HSP70

AATATAGAACTCAGTaAAAGATGGCGGaAAGAACAAAGGATGGTACTATTTATCaCGATAGTAATCCATCTCCTGAAGGC  
CAACTAATCGGATCTGATGATACTGACCCAATACCAAAGCAATCAGACTATGCGaTAATAGGAATAGATCTGGGTACCAC  
tTATTCGTGTGTTGCTtATTTGGGAGAAGCATCGTCTACAGTGATTGCaAATAACATGGGCAATCGAACACGCCTTCTT  
GGGTCAGTTTTTCAGGagGGGAACGTATTTGTTGGAGAAGCGGCGCTCAATAAGGGACTAAGGTTCCCAAAGAATACGGTT  
TATGATGCCAAAAGAAtgatAGGTAGACGCCTTGATGAACCTGCAATTCAAGATCGCTTGAAGAATTGGCCCTTcGCGGT

TGTCCAACATAGGAATAACTGCGCCTTTGAATTGGAATGTAACCATAACCAGAAAGATATTCTGCTTCCGGAGGAAATAT  
CAGCTTATGTGTTAGTCAAGATGAAGCACACTGCAGAGGACTATCTTGGtCATTCTGTCTAGTTTACAGAGTAgTgACGGTg  
CCAGCTTACtTCAACGACTCACAGAGGCAGGCaACCATTGACGCATGCTATGTTGCCGGGCTTAAGGTGGAACGTATTAT  
CaACGAGCCaCaCAGCTGCTGCCCTTGCTTACGGTTTTAGAGAGAAATGCCGGGGCCATgGGAGCCaAAACACTACTGGtGT  
ATGACTTGGGAGGAGGTACACTGGATGTCACTGTGATGACTGTGGATCGTGGAGtGTTTGAGGTGCTAAGTACATGTGGT  
GACACTCAGCTTGGTGGTCAAGACTTTTGATGCCAACTTAGTGGATCACTTCACCGAGGAGATAAAAGaAAAGTTGGGGAA  
AGATATTTCCAATAATTTGAAGGCACTTCGcAAATTGAAAGATCACTGTCAACTTTTAAAGCACAGTCTGTCCCACTCTG  
ATGTTGCTACTCTTGAAGTGAAGGGTTAATTGATGGTGAGGACTTTGAATCTTCACTCTCTCGTGAGAAATTTGCAGAA  
ATTAATCAGTCATTGTTTGACCGTTGCATGAAGCCGATAGGTACAGCCCTAAGTGATGCGGGAATTGGGAAAGAAAATAT  
ACATGAGGTTATCTTGATAGGCGGATCTACAAGAATACCAAAGGTCCAGCAGCtTTTGGGGGAATACTTTTCAGAAGTTG  
CCATCAGCAAGCGCATTAATCCGGACgAAGCCaTTGCAATGGGTgCTGCCATACAAGGTGCC

>HSP90

CAGTGTCAAATCGCCTCCAGCAATCACCCCTGCTGTATAGTTACTAGCCAGTATGGGTGGACTGCTAATATGGAACGCATT  
ATGAAGGCACAAGCATTGCGTGATTCTTCAACAATGGGCTACATGTcGCAAAGAAGCAGCTAGAAATCAACCCGGACCA  
TCCAATCATGGAAAACCTGAAGcAAAAGTTGAGGCTGACAAGAATGACAAAACCTGTCAAAAATTTAGTTTTCTCCTCT  
ATGAAACTGCTCTCTTGGCATCCGGTTTCATGTTGGAGGATCCCCAGGTGCATGCCAACCGCATTTCATCGCTTGGTTAAT  
TTGGGCTTGGGAATTGATGAGAGTGAGACAGTTGAAGATGACGTGCCTCAAGATATGCCATCACTGGAAGAAGGTGACGA  
TGAAGCTTCAAGAATGGAAGATGTTGACTAACAACATAATTATTGGTTATGTAACCTTCTAATATGATATAGCTCTAATCA  
ACTTGTCGCAAAATATTTAGATTTAATTGTAAGCAAAAAAGGTCTAAATGATTACAGAATTCAGTTGCTATTTATaaaA

>FGF

gATCCCTGAATCAGCCATTTTTCGACTCGCTTGTAAtTTTAtCTCCaTCCCTGTTTAtAGAGATCGGAAGAATGTGCTTG  
GAAAGCTATTTGGTGATATTGGAAAGTCTGTTGAGAAAGCTGCTAAAGATGTGAGAAGGACATCGACAAATCAATCCAC  
ACAATCCCTCAAAATGCATTGCAGAATGGAAATATTGTGAAACTTAGGTCAAAATCTAACAATAAGTTCCTTCGTATCTT  
AGAGAATGGAACAATTGACTGTTTCAAGGAGACGGAGGATCAAGCTgTgAGTaCTTGGTGATtgCTTCGATGGAGCACCCCTG  
GCAGTCTCAAGTTCCGCAACATGGCAAACACCTTGTGGTACCTTGGTCTtGTTCAgGGGggCCCAACCcTGCcAaaCCAA  
CCGCCCTCCCATCTACCTAGCCGCTTCTGGTGGAGGACCAGAATGTGACTTCCTTCCTTCGATGCAGTTGGATAACTTTGT  
AGCCCTCCAGTCCCTCCAGTTCCCTGGATCCACATCGGTGCCCTTCCAGCGGCCAGGTTACCTCCCCAACCATGACCC  
CTGCCACCAGTGATGCTGCCTTCTTTAAGGTTGTGTTTCTaAGAAAACAATTTTAAACTGCAAGaAAATGCTAATTTCTG  
CGTGTTCGATCACAGTGGTGAAATACTGTAGCTCCTATGCATAATATATAAACTTTATACATATTTGTTGGCTAAGATA  
TTTTGATAGTAATGTAGACTGCATTCAGTTAATGTTTCATATTGtGAAAAAAtTAAGTTTgaTatC

>nNOS

GCAGCGGATTCAGAtTTGCAGAATGGAGAtgAGGGTAtTCCCctAgTCAGCAGaCaCGTTTCAAGTCAAGTCACTCATGTGA  
tCaTGGTCAGATCATtCaTGAGATGTTGAAGGCCTcTaGtGAGTTTgGGTCCATGTACCTCTTCTTTGGCTGCCGACAGA  
GTACACTGGACCAcGTCTAcAAGGATGAGATGGCGAAAGCTTGCATGTTTGGAGcAGTGGAGAAATGTTATGTTGCACTT  
TCAAGAGAAcCCAACCAGTCAAAGAtGTATGTTCAAGATAAGCTGAAGGAGGAAGCTGATACTGTTGTCCAGTTaCTCAT  
TGCTAGAGGAGcTCACTTCTATGTCTGTgGGGACATCTCaATGGCCAATGATGTTTCCCACTCTCCATAGCATTCTGA  
CTCACAACGCTGCCATGACCGACCAAGAGGCCAGAAGCTTTGTGACTGGAATGAAGGAAAATGGCACGTACCATGAAGAC  
ATTTTTGGTGTTACGCTGAGGACGGCAGAAGTTACTGATAGATTTAGGACAGCTGCTAGAAGAAATGGCAAGTCCAAC  
TAGTAAGACAAGTGTCACAATAGGAGAAGAGTGTTCAGGTGAAGGAGCACAGACCAGTAGTGACAGCAGTGCAGCTGC  
TCGCTAGACATGaCGTCCCAACACAAATTAGTTACAGTTTGAAGGACAAGACACTCCCTTCTGGAAGAAAGATCTCTCAG  
CATTCACACAGTGGACACCTTGTGTATTGAGATGActTTGAGAGACACCTTCCAAGTTATAGTTGCCATAGAAATAACAT  
GCTTTAAATGGTTTAGCATATAtTTTCTGATTTCTGTGTACACTTTAAATCCATAGTCATTTTTTACGTGCATGCTTATTGC  
ATGTACATaATaaa

>Wnt

AAGTTAATAGAATCTAATGCAAACCTCTTTGCTTTggaTGTAACCTATTgCTCATCAGTTgagATCAGAGAGGGGTTGGAG  
GAAACTAGTGAACGGAACCTGTATCAGATACCTTCACTGCGCACTGCAGCATTAtGGTCACTATCACTGTGACATGCTGC  
CGTTGTTTGAACCTTGGCAGTTTACATCACCAAAGGTAtTTGGTAAACATTAAAGCTGCGTTTTAtTCCTCTGAATGACTTG  
ATGGAAGAGTTCAAGGGACTGTCACAATTGTCTGATGTCTCTCTCATGGAgATACATCAGACCAAAGGCTTCACTCAGGT  
CTGGTGGACACTCAAGTCCGGGCTCTTTCCCATCACTGGACTCCTCCTAGCTGTGTTTTATTTGGAACTAGGTTACAGAC  
AGAGGACACTTCTAGAGGGAGCTCTTATCTTTTTTGGGAGCTGCAGTCACTGGTTTGGGAGTTCCTGTGGAAGTGTATCT  
CTGTACTATGACTGCCCTTGGTTAATAGTCTTCAATGATGTCCGAGTTGGTCTTGTAGTGCTAGCCCTCTCTGCCTACTG  
GGTCATATTCAATTGGAGAGCATTCTAAGGTGTCAACCTTGGACCATACACTGGGGAAATATTGGAAAGAACTGGCTGCAG  
CCTCCCTTGGGTGCATTGTACTATTTGTGTATGAATTTTGTGAGCGAGGCATTCAAGTcGTGTATCCCTTCTTCAGTTTa  
TGGTCAACTCCACACACTCAACTAATGGCAAATGTGTTTCTAGCAATATCCATCACTGCAGCAGCATTGTACAGTGTGAT

GCTGTTAGTGAGATTGGTGTCTAGTGTGGTTGAGTGTTCCTGAGAAGGAGAAAGTGCTGGAAGGTATGGCAGAGATGCCCA  
AAGCAGCTTATAGAAGGTCAATGTCGCAATTCAAGTTCCTCTTGACCATGTTGACAATAACAGCTGCAGTCACTTTATCA  
ACTTTCATACCAACTGAGATACATGACTTTGGAATGGAGGCTTCAGCCGCAACCATGTCCGTATACAGTGGTATACTGAC  
AGGGAGTTATGCCCTTTGGAATGTGTATACTGTGATAGTCTTAGTGGAGCACATAATCGGGGTTCAAGATCTGTTTCGTT  
TAACTTaATGTGCTAGTCGCTCACAGTaGCTACTTTGTGTGGTTGTTAGTGGAGACCAATTGCTACTATGTTGTGCACAT  
GTGCTCTTGTGATGCAGATAAGTCCAGATTGATTGGATATACAGCAGAAAGACTTTTAAACAAAGGCTCGCAAGAATAGA  
CACTTATGCTACATTGTCACTTACTTCAGTATCAAGTATACATGATTATGTTAATATGAATACACTGAGTAGAGTGATGT  
GCTTTGAAGTGTTCTATTCTCCTg

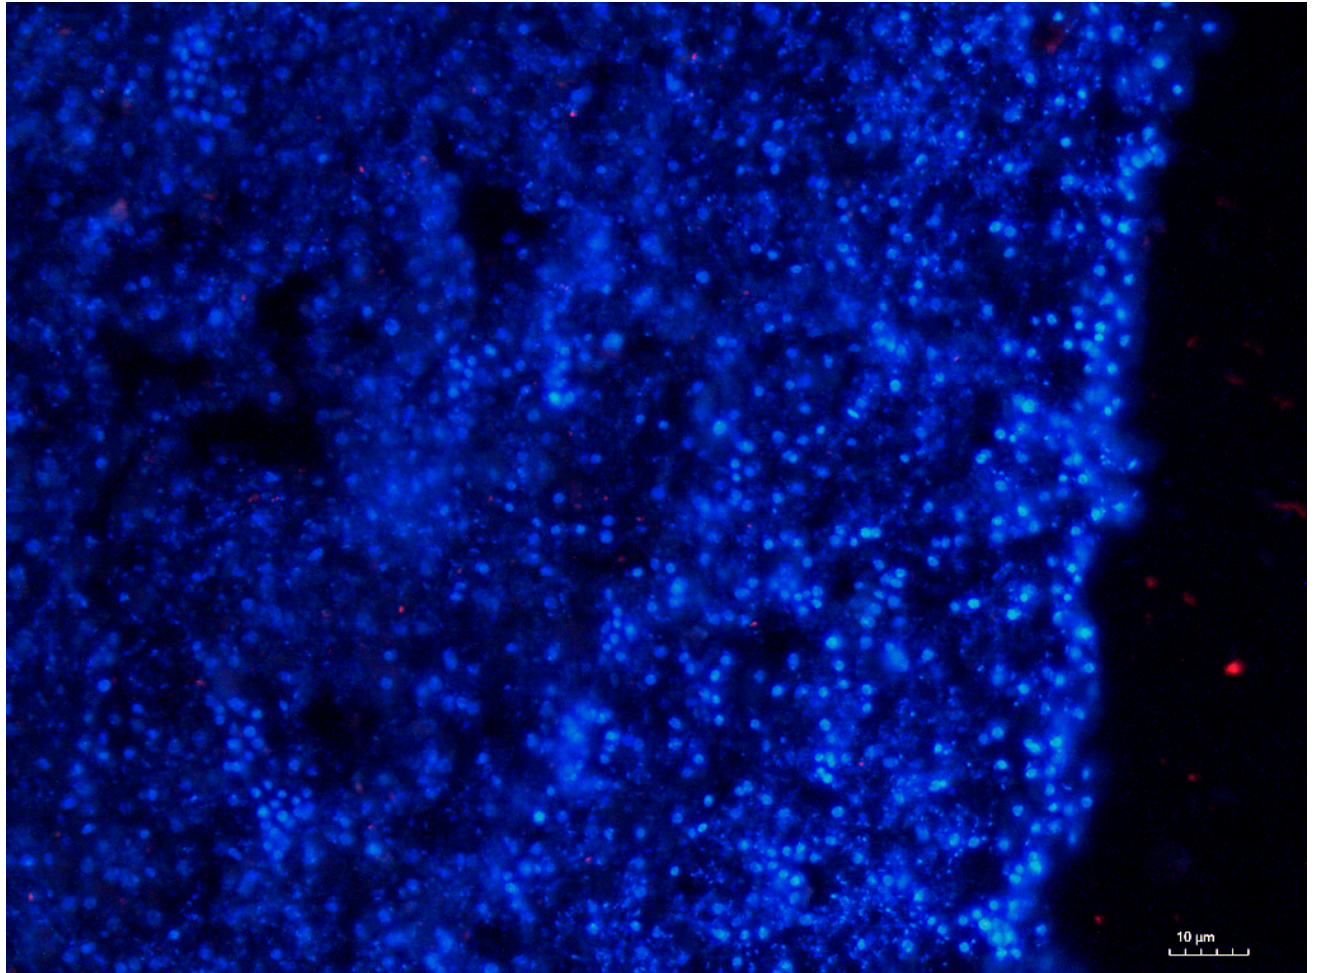

**Figure S1.** Negative control of Figure 3. Histological sections showing the regenerating edges of *Chondrosia reniformis* fragments 24 h after being cut.

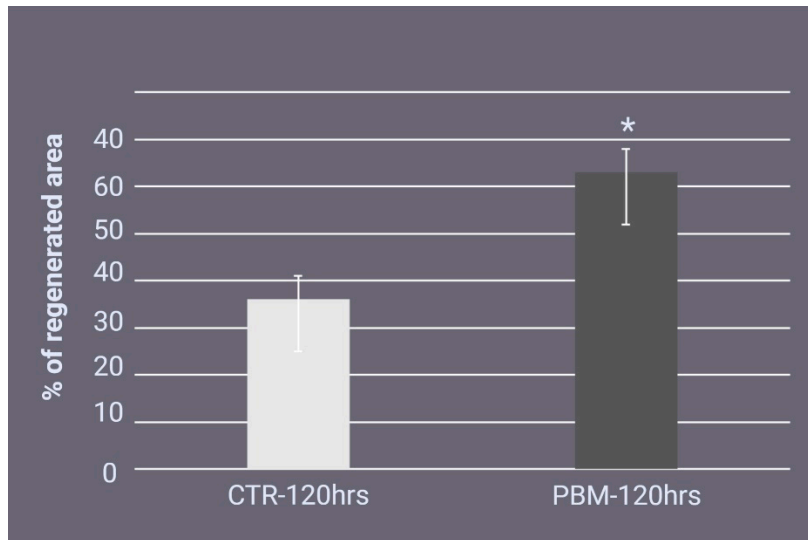

**Figure S2.** Percentage of regeneration at 120 hours (hrs) from cutting. The asterisks indicate significant differences between groups based on the t-student test, \* $p < 0.05$ . The program ImageJ was employed to investigate surface areas [69].
